# Supplementary material for: Head-to-Head Comparison of 8 Plasma Amyloid-β 42/40 Assays in Alzheimer Disease
Source: PubMed Central journal article supplement (PMC8453354; doi:10.1001/jamaneurol.2021.3180), 2021-09-20
Supplement: jamaneurol-e213180-s001.pdf [file jamaneurol-e213180-s001.pdf]

## Supplemental Online Content

Janelidze S, Teunissen CE, Zetterberg H, et al. Head-to-head comparison of 8 plasma amyloid- $\beta$  42/40 assays in Alzheimer disease. *JAMA Neurol*. Published online September 20, 2021. doi:10.1001/jamaneurol.2021.3180

### eMethods

**eFigure.** Correlations between plasma and CSF A $\beta$  in the whole cohort (n=286)

**eTable 1.** Plasma A $\beta$ 42 and A $\beta$ 40 assays in BioFINDER

**eTable 2.** Preanalytical sample handling in BioFINDER

**eTable 3.** Characteristics of a subcohort of participants in BioFINDER where plasma A $\beta$  was measured using IP-MS-Shim

**eTable 4.** Characteristics of a subcohort of participants in BioFINDER where plasma A $\beta$  was measured using IP-MS-UGOT and IA-Quan

**eTable 5.** Plasma concentrations of A $\beta$ 42 and A $\beta$ 40 in BioFINDER

**eTable 6.** ROC analysis for abnormal CSF A $\beta$ 42 and A $\beta$ 40EI status in BioFINDER

**eTable 7.** ROC analysis of plasma A $\beta$ 42 and A $\beta$ 40 combined with APOE  $\epsilon$ 4 genotype for abnormal CSF A $\beta$ 42 and A $\beta$ 40 in BioFINDER

**eTable 8.** Plasma concentrations of A $\beta$ 42 and A $\beta$ 40 in ADNI

### eReferences

**eAppendix.** ADNI Investigators

This supplemental material has been provided by the authors to give readers additional information about their work.

## **eMethods**

### **BioFINDER**

#### ***Participants***

We included 286 participants from the prospective Swedish BioFINDER-1 (NCT03174938) study recruited between 2010 and 2014 at Skåne University Hospital and the Hospital of Ängelholm, Sweden. Cognitively healthy elderly individuals were randomly enrolled from a population-based community cohort study in Malmö, Sweden (Malmö Diet and Cancer Study). Patients with subjective cognitive decline (SCD) or mild cognitive impairment (MCI) were consecutively included after referral from the primary care to the memory clinics. The inclusion criteria for cognitively healthy elderly were 1) absence of cognitive symptoms as assessed by a physician with special interest in cognitive disorders, 2) age  $\geq 60$  years, 3) MMSE 28-30 points at screening visit, 4) did not fulfill the criteria for mild cognitive impairment (MCI) or any dementia disorder, and 5) fluency in Swedish. The exclusion criteria were 1) significant unstable systemic illness or organ failure, such as terminal cancer, that made it difficult to participate in the study, 2) current significant alcohol or substance misuse and 3) significant neurological or psychiatric illness. The inclusion criteria for patients with SCD or MCI (defined using criteria by Petersen<sup>1</sup>) were (1) referred to a participating memory clinic because of cognitive complaints, (2) age 60 to 80 years, (3) did not fulfill the criteria for any dementia disorder and (4) fluency in Swedish. The exclusion criteria were 1) significant unstable systemic illness or organ failure, such as terminal cancer, that made it difficult to participate in the study, 2) current significant alcohol or substance misuse and 3) cognitive impairment that without doubt could be explained by other specific non-neurodegenerative disorders, such as brain tumor or subdural hematoma. Patients were classified as SCD or MCI following neuropsychological assessment including a test battery evaluating verbal ability, episodic memory function, visuospatial construction ability, and attention and executive functions.<sup>2</sup> In accordance with the research framework by the National Institute on Aging-Alzheimer's Association study patients with SCD and cognitively healthy individuals were considered as cognitively unimpaired (CU).<sup>3</sup> In this study, we selected all participants from BioFINDER who underwent [<sup>18</sup>F]flutemetamol PET imaging (n=416) with plasma samples available at the time of analysis except that the samples were randomly selected for the IP-MS-Shim, IP-MS-UGOT and IA-Quan assays.

#### ***Plasma and cerebrospinal fluid (CSF) sampling***

Blood and CSF samples were collected in the morning during the same visit with participants non-fasting. Blood was collected in 6 EDTA-plasma tubes (Vacutainer<sup>®</sup> K2EDTA tube, BD Diagnostics) and centrifuged (2000g, +4°C) for 10 min. Following centrifugation, plasma from all 6 tubes was transferred into one 50ml polypropylene tubes tube, mixed and 1ml was aliquoted into 1.5ml polypropylene tubes and stored at -80°C within 30-60 min of collection.

In all study participants, plasma concentrations of A $\beta$ 42 and A $\beta$ 40 were measured using previously described IP-MS-based method developed at Washington University (IP-MS-WashU), antibody-free liquid chromatography-MS developed by Araclon (LC-MS-Arc) as well as Elecsys immunoassays from Roche Diagnostics International Ltd (IA-Elc), immunoassays from Euroimmun (IA-EI) and N4PE Simoa immunoassays from Quanterix (IA-N4PE).<sup>4-7</sup> In sub-cohorts of study participants, plasma samples were analyzed using IP-MS-based method developed by Shimadzu (IP-MS-Shim) and another Simoa immunoassay from Quanterix (IA-Quan).<sup>8,9</sup> A $\beta$ 42 and A $\beta$ 40 levels in CSF were determined with Elecsys and Euroimmun CSF immunoassays.

#### ***Plasma and CSF A $\beta$ analysis***

##### **IP-MS-WashU**

Plasma samples were spiked with <sup>15</sup>N-A $\beta$ 40 and <sup>15</sup>N-A $\beta$ 42 for use as analytical reference standards. A $\beta$ 42 and A $\beta$ 40 isoforms were immunoprecipitated using a monoclonal anti-A $\beta$  mid-domain antibody (HJ5.1, anti-A $\beta$ 13-28). Liquid chromatography-tandem mass spectrometry (LC-MS/MS) and analysis of mass spectrometry data were performed as previously described.<sup>4,10</sup> Plasma samples were analyzed at the Department of Neurology, Washington University School of Medicine (St. Louis, MO, USA) between September 2019 and January 2020.

##### **IP-MS-Shim**

Plasma samples were with the SIL-A $\beta$ 1-38 peptide was used as internal standard for normalization of signals for all A $\beta$ -related peptides in the mass spectrum. A $\beta$ 42 and A $\beta$ 40 isoforms were immunoprecipitated using a

monoclonal anti-A $\beta$  6E10 antibody. MALDI-TOF mass spectrometry and analysis of mass spectrometry data were performed as previously described.<sup>9</sup> Analysis of A $\beta$ 40 and A $\beta$ 42 failed in 37 plasma samples, there was no second aliquot to repeat the analysis and, therefore, these samples were excluded from the present study. Samples were analyzed at the Shimadzu Techno-Research Inc. (Kyoto, Japan) between January and February 2019.

#### **LC-MS-Arc**

Plasma A $\beta$ 40 and A $\beta$ 42 concentrations were measured using an antibody-free liquid chromatography-differential mobility spectrometry-triple quadrupole mass spectrometric (HPLC-DMS-MS/MS) method.<sup>11</sup> The analytical platform was composed of a QTRAP 6500+ SelexION hybrid linear ion trap-triple quadrupole mass spectrometer, fitted with a differential mobility spectrometry interface and coupled to a M3 Micro LC system (all from Sciex, Framingham, MA, USA). Analytes were extracted directly from plasma; no immunoprecipitation procedure was followed. Intact A $\beta$ 40 and A $\beta$ 42 species were measured as no enzymatic digestion was performed. Analysis of A $\beta$ 40 and A $\beta$ 42 failed in 60 plasma samples due to an over-pressure in the chromatographic system, there was no second aliquot to repeat the analysis and, therefore, these samples were excluded from the present study. Samples were analyzed at Araclon Biotech Ltd. (Zaragoza, Spain) in November 2019.

#### **IP-MS-UGOT**

<sup>15</sup>N-A $\beta$ 40 and <sup>15</sup>N-A $\beta$ 42 recombinant peptides were added to samples and A $\beta$  peptides were immunoprecipitated with anti-amyloid- $\beta$  antibodies 4G8 (epitope 17–27 in the amyloid- $\beta$  sequence) and 6E10 (epitope 1–16, both antibodies from BioLegend). LC-MS/MS and analysis of mass spectrometry data were performed as previously described.<sup>12</sup> Analysis of A $\beta$ 40 and A $\beta$ 42 failed in 14 plasma samples, there was no second aliquot to repeat the analysis and, therefore, these samples were excluded from the present study. Plasma samples were analyzed at the Clinical Neurochemistry Laboratory, University of Gothenburg (Gothenburg, Sweden) in May-June 2021.

#### **IA-Elc**

CSF and plasma samples were analyzed using the Elecsys A $\beta$ 42 and A $\beta$ 40 immunoassays on a **cobas e 601** analyzer at the Clinical Neurochemistry Laboratory, University of Gothenburg (Gothenburg, Sweden). CSF and plasma A $\beta$ 42 and A $\beta$ 40 assays were performed as previously described.<sup>6</sup> For plasma assays, different calibrator range and plasma controls were used. For plasma A $\beta$ 40 analysis, a biotinylated monoclonal A $\beta$ 40 specific antibody (23C2) and a monoclonal  $\beta$ -Amyloid-specific antibody (3D6) labeled with a ruthenium complex were used. The Elecsys  $\beta$ -Amyloid(1–42) CSF immunoassay is approved for use in countries accepting the CE mark; the Elecsys  $\beta$ -Amyloid(1–40) CSF immunoassay is a robust prototype assay (for research use only) which is not commercially available. Plasma samples were analyzed in November-December 2017.

#### **IA-EI**

CSF and plasma A $\beta$ 42 and A $\beta$ 40 were quantified using CSF and plasma kits according to the manufacturer's instructions. Samples were analyzed at EUROIMMUN AG (Luebeck, Germany) between May and November 2017.

#### **IA-N4PE and IA-Quan**

N4PE Simoa immunoassays are specific for the first amino acid of A $\beta$ . These assays were developed by Amsterdam UMC and ADxNeurosciences and are now commercially available from Quanterix.<sup>7,13</sup> Plasma samples were analyzed using N4PE 4-plex kit according to the manufacturer's instructions. Plasma levels of A $\beta$ 42 and A $\beta$ 40 were also quantified using single-plex Simoa kits from Quanterix as previously described.<sup>8</sup> The Simoa A $\beta$ 40 and A $\beta$ 42 assays both utilize the same capture antibody targeting the N-terminus of  $\beta$ -amyloid and different C-terminus detection antibodies specific to A $\beta$ 40 and A $\beta$ 42. The assays use  $\beta$ -amyloid (1-40) and (1-42) peptides as standards. The antibody pairs are the same in the IA-Quan A $\beta$ 42/A $\beta$ 40 single-plex kits and widely used Simoa Neuro 3-plex kit, but in the 3-plex kit the detection antibodies from the single-plex kits are used as capture antibodies and vice versa.

IA-N4PE and IA-Quan analyses were performed at the Neurochemistry laboratory of the Amsterdam UMC location VUmc (Amsterdam, Netherlands) in May-June 2020 and Quanterix Corporation (Lexington, MA, USA) between December 2014 and January 2015, respectively.

### ***[<sup>18</sup>F]flutemetamol PET***

Cerebral A $\beta$  deposition was visualized with the PET tracer [<sup>18</sup>F]flutemetamol (approved by the Food and Drug Administration, and the European Medical Agency). [<sup>18</sup>F]flutemetamol was manufactured at the radiopharmaceutical production site in Risø, Denmark, using a FASTlab synthesizer module (GE Healthcare, Cleveland, OH). Subjects received a single dose of [<sup>18</sup>F]flutemetamol according to a method described previously.<sup>14</sup> PET/CT scanning of the brain was conducted at two sites using the same type of scanner (Gemini, Philips Healthcare, Best, the Netherlands). Sum images (from 90-110 min post injection) were analyzed using the software NeuroMarQ (GE Healthcare, Cleveland, OH, USA). [<sup>18</sup>F]flutemetamol activity was quantified with a previously described fully automated PET-only method that uses an adaptive template for handling different uptake patterns in negative and positive [<sup>18</sup>F]flutemetamol images.<sup>15</sup> [<sup>18</sup>F]flutemetamol images were spatially normalized to Montreal Neurological Institute template space using the adaptive template method. A volume of interest (VOI) template was applied for the following 9 bilateral regions: prefrontal, parietal, lateral temporal, medial temporal, sensorimotor, occipital, anterior cingulate, posterior cingulate/precuneus, and a global neocortical composite region composed by all these regions.<sup>15</sup> The standardized uptake value ratio (SUVR) was defined as the uptake in a VOI normalized for the cerebellar cortex uptake.

### **ADNI**

ADNI plasma samples were analyzed between December 2020 and March 2021. Detailed information on sample handling procedures, assay protocols and performance are available from the ADNI database (for up-to-date information, see [www.adni-info.org](http://www.adni-info.org) and [adni.loni.usc.edu](http://adni.loni.usc.edu)).

## eFigure

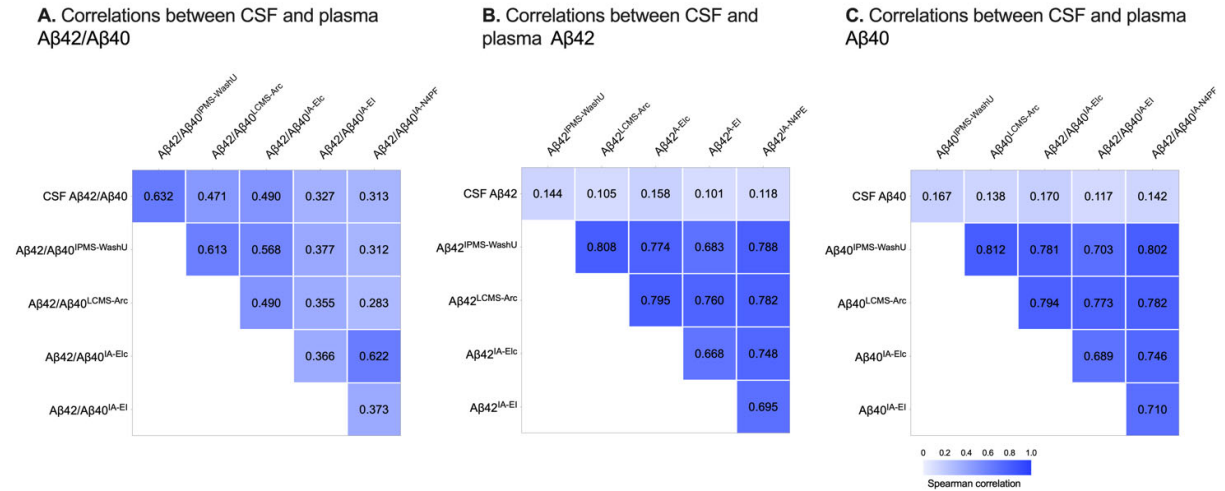

**Correlations between plasma and CSF A $\beta$  in the whole cohort (n=286).** Heatmaps showing Spearman coefficients for correlations between plasma A $\beta$  measured using IP-MS-WashU, LC-MS-Arc, IA-Elc, IA-EI and IA-N4PE and CSF A $\beta$  measured using Elecsys immunoassays.

A $\beta$ , amyloid- $\beta$ ; CSF, cerebrospinal fluid; IA-EI, immunoassay from Euroimmun; IA-Elc, Elecsys immunoassay from Roche Diagnostics; IA-N4PE, N4PE Simoa immunoassay from Quanterix assay; IPMS-WashU, immunoprecipitation-coupled mass spectrometry method developed at Washington University; LCMS-Arc, antibody-free liquid chromatography-mass spectrometry method developed by Araclon.

**eTable 1.** Plasma A $\beta$ 42 and A $\beta$ 40 assays in BioFINDER

| Assay/platform            | Capture IA antibodies | Average intra-assay CV, % | Average inter-assay CV, % | Failed samples, % |
|---------------------------|-----------------------|---------------------------|---------------------------|-------------------|
| IP-MS-WashU               |                       |                           |                           |                   |
| A $\beta$ 42              | NA                    | 0.69                      | 4.18                      | 0                 |
| A $\beta$ 40              | NA                    | 0.53                      | 5.43                      | 0                 |
| A $\beta$ 42/A $\beta$ 40 | NA                    | 0.72                      | 3.46                      | 0                 |
| LC-MS-Arc                 |                       |                           |                           |                   |
| A $\beta$ 42              | NA                    | NA                        | 6.0                       | 14.6*             |
| A $\beta$ 40              | NA                    | NA                        | 4.4                       | 13.7*             |
| IP-MS-UGOT                |                       |                           |                           |                   |
| A $\beta$ 42              | NA                    | 12.5                      | 13.2                      | 4                 |
| A $\beta$ 40              | NA                    | 5.8                       | 7.4                       | 4                 |
| IA-Elc                    |                       |                           |                           |                   |
| A $\beta$ 42              | A $\beta$ (1-42)      | 1.2                       | 1.9                       | 0                 |
| A $\beta$ 40              | A $\beta$ (1-40)      | 1.1                       | 1.0                       | 0                 |
| IA-EI                     |                       |                           |                           |                   |
| A $\beta$ 42              | A $\beta$ (1-42)      | 1.7                       | 7.1                       | 0                 |
| A $\beta$ 40              | A $\beta$ (1-40)      | 2.2                       | 6.0                       | 0                 |
| IA-N4PE                   |                       |                           |                           |                   |
| A $\beta$ 42              | A $\beta$ (1-42)      | 2.3                       | 5.0                       | 0                 |
| A $\beta$ 40              | A $\beta$ (1-40)      | 2.1                       | 5.0                       | 0                 |
| IP-MS-Shim                |                       |                           |                           |                   |
| A $\beta$ 42              | NA                    | 6.9                       | 16.7                      | 12.3**            |
| A $\beta$ 40              | NA                    | 7.4                       | 11.0                      | 12.3**            |
| A $\beta$ 42/A $\beta$ 40 | NA                    | 5.7                       | 10.1                      | 12.3**            |
| IA-Quan                   |                       |                           |                           |                   |
| A $\beta$ 42              | A $\beta$ (N-42)      | 7.4                       | 10.6                      | 0                 |
| A $\beta$ 40              | A $\beta$ (N-40)      | 3.1                       | 11.0                      | 0                 |

\* Analysis of A $\beta$ 40 and A $\beta$ 42 failed due to an over-pressure in the chromatographic system.

\*\* \*\* One batch of assay was omitted due to unexpected system instability

Abbreviations: CV, coefficient of variability; IA, immunoassay; N/A, not available.

**eTable 2.** Preanalytical sample handling in BioFINDER

| Assay/platform | Thaw temperature                                   | Sample mixing        | Centrifugation                                               | Sample dilution                                 | Sample volume (after dilution) per replicate                                                 |
|----------------|----------------------------------------------------|----------------------|--------------------------------------------------------------|-------------------------------------------------|----------------------------------------------------------------------------------------------|
| IP-MS-WashU    | RT (22°C)                                          | 1000 rpm, 10 min     | 10000 rcf, 5 min                                             | undiluted                                       | 0.45ml                                                                                       |
| LC-MS-Arc      | RT                                                 | Brief vortexing      | 14000 rcf, 5 min                                             | undiluted                                       | 0.2ml                                                                                        |
| IP-MS-UGOT     | RT                                                 | Brief vortexing      | Only in case debris was detected visually (14000 rcf, 1 min) | undiluted                                       | 0.25ml                                                                                       |
| IA-Elc         | RT                                                 | Rolling mixer, 20min | Only in case debris was detected (14000 rcf, 1 min)          | undiluted                                       | Aβ42 35μl<br>Aβ40 30μl                                                                       |
| IA-EI          | RT                                                 | Brief vortexing      | No                                                           | 1:4                                             | 80μl                                                                                         |
| IA-N4PE        | In front of a cold-air fan at RT, for ~ 15 minutes | Brief vortexing      | 10000 rcf, 10min                                             | 4-fold automated dilution on board of the Simoa | ≥80μl provided to Simoa for two replicates ( <i>i.e.</i> , 25μl*replicates+30μl dead volume) |
| IP-MS-Shim     | RT                                                 | Brief vortexing      | 2273g, 5min                                                  | 1:1                                             | 0.3ml                                                                                        |
| IA-Quan        | RT                                                 | Brief vortexing      | 20000 rcf, 3min                                              | Aβ42 1:4<br>Aβ40 1:8                            | 0.1ml                                                                                        |

Abbreviations: min, minutes; rcf, relative centrifugal force; rpm, revolutions per minute; RT, room temperature

**eTable 3.** Characteristics of a subcohort of participants in BioFINDER where plasma A $\beta$  was measured using IP-MS-Shim

|                                                         | A $\beta$ -negative<br>n=114 | A $\beta$ -positive<br>n=86 | P-value |
|---------------------------------------------------------|------------------------------|-----------------------------|---------|
| Diagnosis, CU/MCI, n                                    | 80/34                        | 33/53                       | 8.0e-6  |
| Age, years                                              | 69.0 (66.0-75.0)             | 74.0 (70.0-77.0)            | 0.0004  |
| Female, n (%)                                           | 61 (53.5)                    | 32 (37.2)                   | 0.031   |
| Duration of education, years <sup>a</sup>               | 12.0 (9.0-14.0)              | 10.0 (9.0-13.0)             | 0.020   |
| MMSE                                                    | 29.0 (28.0-30.0)             | 28.0 (26.0-29.0)            | 8.9e-5  |
| <i>APOE</i> $\epsilon$ 4 positivity, n (%) <sup>a</sup> | 23 (20.4)                    | 60 (69.8)                   | 2.7e-12 |
| A $\beta$ -PET, [ <sup>18</sup> F]Flutemetamol SUVR     | 1.19 (1.12-1.26)             | 1.88 (1.67-2.19)            | 1.1e-33 |
| CSF A $\beta$ 42/A $\beta$ 40                           | 0.094 (0.083-0.103)          | 0.038 (0.033-0.048)         | 1.1e-33 |
| Plasma A $\beta$ 42/A $\beta$ 40                        |                              |                             |         |
| A $\beta$ 42/A $\beta$ 40 <sup>IPMS-WashU</sup>         | 0.132 (0.127-0.139)          | 0.122 (0.117-0.125)         | 2.2e-19 |
| A $\beta$ 42/A $\beta$ 40 <sup>IPMS-Shim</sup>          | 0.052 (0.049-0.059)          | 0.046 (0.043-0.049)         | 3.9e-15 |
| A $\beta$ 42/A $\beta$ 40 <sup>LCMS-Arc</sup>           | 0.321 (0.294-0.346)          | 0.285 (0.265-0.305)         | 3.0e-11 |
| A $\beta$ 42/A $\beta$ 40 <sup>IA-Elc</sup>             | 0.067 (0.064-0.073)          | 0.062 (0.058-0.065)         | 3.9e-11 |
| A $\beta$ 42/A $\beta$ 40 <sup>IA-EI</sup>              | 0.182 (0.159-0.199)          | 0.160 (0.145-0.174)         | 8.3e-7  |
| A $\beta$ 42/A $\beta$ 40 <sup>IA-N4PE</sup>            | 0.133 (0.117-0.149)          | 0.118 (0.104-0.132)         | 1.5e-5  |

A $\beta$  status was defined using the CSF A $\beta$ 42/A $\beta$ 40 cutoff as described in the Methods.

Data are shown as median (interquartile range) unless otherwise specified. Differences between the groups were tested using Mann-Whitney U test and Fisher's Exact test (diagnosis, sex and *APOE*).

<sup>a</sup> Education is missing for two study participants; *APOE*  $\epsilon$ 4 is missing for one study participant.

A $\beta$ , amyloid- $\beta$ ; CSF, cerebrospinal fluid; CU, cognitively unimpaired; F, female; IA-EI, immunoassay from Euroimmun; IA-Elc, Elecsys immunoassay from Roche Diagnostics; IA-N4PE, N4PE Simoa immunoassay from Quanterix assay; IPMS-Shim, immunoprecipitation coupled mass spectrometry method developed by Shimadzu; IPMS-WashU, immunoprecipitation-coupled mass spectrometry method developed at Washington University; LCMS-Arc, antibody-free liquid chromatography-mass spectrometry method developed by Araclon; MCI, mild cognitive impairment; MMSE, Mini Mental State Examination; PET positron emission tomography.



**eTable 4.** Characteristics of a subcohort of participants in BioFINDER where plasma A $\beta$  was measured using IP-MS-UGOT and IA-Quan

|                                                     | A $\beta$ -negative<br>n=139 | A $\beta$ -positive<br>n=94 | P-value |
|-----------------------------------------------------|------------------------------|-----------------------------|---------|
| Diagnosis, CU/MCI, n                                | 107/29                       | 49/42                       | 0.0001  |
| Age, years                                          | 71.5 (67.0-75.0)             | 73.0 (70.0-76.0)            | 0.017   |
| Female, n (%)                                       | 78 (57.4.0)                  | 42 (46.2)                   | 0.105   |
| Duration of education, years <sup>a</sup>           | 12.0 (9.0-14.0)              | 11.0 (9.0-13.0)             | 0.11    |
| MMSE                                                | 29.0 (28.0-30.0)             | 28.0 (26.0-29.0)            | 0.0001  |
| <i>APOE</i> $\epsilon$ 4 positivity No., %          | 25 (18.4)                    | 58 (63.7)                   | 4.5e-12 |
| A $\beta$ -PET, [ <sup>18</sup> F]Flutemetamol SUVR | 1.19 (1.11-1.27)             | 1.83 (1.54-2.12)            | 4.4e-30 |
| CSF A $\beta$ 42/A $\beta$ 40                       | 0.093 (0.079-0.102)          | 0.041 (0.034-0.049)         | 2.7e-37 |
| Plasma A $\beta$ 42/A $\beta$ 40                    |                              |                             |         |
| A $\beta$ 42/A $\beta$ 40 <sup>IPMS-WashU</sup>     | 0.132 (0.126-0.139)          | 0.122 (0.117-0.126)         | 6.3e-18 |
| A $\beta$ 42/A $\beta$ 40 <sup>LCMS-Arc</sup>       | 0.322 (0.299-0.344)          | 0.289 (0.266-0.305)         | 1.8e-11 |
| A $\beta$ 42/A $\beta$ 40 <sup>IPMS-UGOT</sup>      | 0.073 (0.063-0.094)          | 0.060 (0.048-0.077)         | 6.0e-6  |
| A $\beta$ 42/A $\beta$ 40 <sup>IA-Elc</sup>         | 0.067 (0.065-0.072)          | 0.062 (0.057-0.065)         | 4.7e-14 |
| A $\beta$ 42/A $\beta$ 40 <sup>IA-EI</sup>          | 0.183 (0.165-0.200)          | 0.165 (0.148-0.175)         | 4.6e-7  |
| A $\beta$ 42/A $\beta$ 40 <sup>IA-N4PE</sup>        | 0.136 (0.121-0.148)          | 0.119 (0.107-0.133)         | 1.4e-7  |
| A $\beta$ 42/A $\beta$ 40 <sup>IA-Quan</sup>        | 0.069 (0.061-0.080)          | 0.063 (0.056-0.074)         | 0.001   |

A $\beta$  status was defined using the CSF A $\beta$ 42/A $\beta$ 40 cutoff as described in the Methods.

Data are shown as median (interquartile range) unless otherwise specified. Differences between the groups were tested using Mann-Whitney U test and Fisher's Exact test (diagnosis, sex and *APOE*).

<sup>a</sup> Education is missing for one study participant.

A $\beta$ , amyloid- $\beta$ ; CSF, cerebrospinal fluid; CU, cognitively unimpaired; F, female; IA-EI, immunoassay from Euroimmun; IA-Elc, Elecsys immunoassay from Roche Diagnostics; IA-N4PE, N4PE Simoa immunoassay from Quanterix assay; IA-Quan, Simoa immunoassay from Quanterix; IPMS-UGOT, immunoprecipitation-coupled mass spectrometry method developed at the University of Gothenburg; IPMS-WashU, immunoprecipitation-coupled mass spectrometry method developed at Washington University; LCMS-Arc, antibody-free liquid chromatography-mass spectrometry method developed by Araclon; MCI, mild cognitive impairment; MMSE, Mini Mental State Examination; PET positron emission tomography.

**eTable 5.** Plasma concentrations of A $\beta$ 42 and A $\beta$ 40 in BioFINDER

|                                    | <b>A<math>\beta</math>-negative<br/>n=168</b> | <b>A<math>\beta</math>-positive<br/>n=118</b> | <b>P-value</b> |
|------------------------------------|-----------------------------------------------|-----------------------------------------------|----------------|
| A $\beta$ 42 <sup>IPMS-WashU</sup> | 33.1 (30.2-36.0)                              | 30.3 (27.3-33.5)                              | 1.0e-5         |
| A $\beta$ 40 <sup>IPMS-WashU</sup> | 250.8 (230.3-279.2)                           | 247.4 (226.3-279.2)                           | 0.73           |
| A $\beta$ 42 <sup>LCMS-Arc</sup>   | 92.4 (81.8-99.9)                              | 79.9 (72.4-94.3)                              | 1.3e-7         |
| A $\beta$ 40 <sup>LCMS-Arc</sup>   | 279.8 (261.5-303.8)                           | 284.9 (251.3-316.0)                           | 0.79           |
| A $\beta$ 42 <sup>IA-Elc</sup>     | 31.9 (29.4-34.3)                              | 29.3 (26.8-32.8)                              | 1.8e-5         |
| A $\beta$ 40 <sup>IA-Elc</sup>     | 469.0 (438.3-505.8)                           | 476.0 (435.8-529.0)                           | 0.24           |
| A $\beta$ 42 <sup>IA-EI</sup>      | 27.6 (22.7-31.3)                              | 25.3 (20.9-28.9)                              | 0.007          |
| A $\beta$ 40 <sup>IA-EI</sup>      | 150.4 (138.7-167.1)                           | 155.6 (136.7-177.9)                           | 0.20           |
| A $\beta$ 42 <sup>IA-N4PE</sup>    | 11.5 (9.8-13.1)                               | 10.1 (8.7-11.9)                               | 0.0005         |
| A $\beta$ 40 <sup>IA-N4PE</sup>    | 85.0 (76.2-98.0)                              | 87.8 (73.9-98.6)                              | 0.70           |
| A $\beta$ 42 <sup>IPMS-Shim</sup>  | 0.488 (0.426-0.572)<br>n=114                  | 0.454 (0.383-0.528)<br>n=86                   | 0.005          |
| A $\beta$ 40 <sup>IPMS-Shim</sup>  | 9.1 (8.2-10.1)<br>n=114                       | 9.5 (8.2-11.2)<br>n=86                        | 0.10           |
| A $\beta$ 42 <sup>IPMS-UGOT</sup>  | 17.4 (14.2-22.5)<br>n=136                     | 14.8 (11.7-17.8)<br>n=91                      | 0.0001         |
| A $\beta$ 40 <sup>IPMS-UGOT</sup>  | 230.5 (209.0-264.0)<br>n=136                  | 234.3 (210.8-265.4)<br>n=91                   | 0.45           |
| A $\beta$ 42 <sup>IA-Quan</sup>    | 19.1 (16.5-22.7)<br>n=136                     | 17.4 (14.8-20.8)<br>n=91                      | 0.011          |
| A $\beta$ 40 <sup>IA-Quan</sup>    | 269.3 (238.4-307.3)<br>n=136                  | 270.7 (231.1-323.2)<br>n=91                   | 0.84           |

A $\beta$  status was defined using the CSF A $\beta$ 42/A $\beta$ 40 cutoff as described in the Methods.

Biomarker concentrations are shown in pg/ml except A $\beta$ 42<sup>IPMS-Shim</sup> and A $\beta$ 40<sup>IPMS-Shim</sup> where the values are signal intensity normalized to the internal standard SIL-A $\beta$ (1–38).

A $\beta$ , amyloid- $\beta$ ; IA-EI, immunoassay from Euroimmun; IA-Elc, Elecsys immunoassay from Roche Diagnostics; IA-N4PE, N4PE Simoa immunoassay from Quanterix; IPMS-UGOT, immunoprecipitation-coupled mass spectrometry method developed at the University of Gothenburg; IA-Quan, Simoa immunoassay from Quanterix; IPMS-Shim, immunoprecipitation coupled mass spectrometry method developed by Shimadzu; IPMS-WashU, immunoprecipitation-coupled mass spectrometry method developed at Washington University; LCMS-Arc, antibody-free liquid chromatography-mass spectrometry method developed by Araclon.

**eTable 6.** ROC analysis for abnormal CSF A $\beta$ 42 and A $\beta$ 40<sup>EI</sup> status in BioFINDER

|                                                                                                                                      | CSF A $\beta$ 42/A $\beta$ 40    |
|--------------------------------------------------------------------------------------------------------------------------------------|----------------------------------|
| <b>Whole cohort, A<math>\beta</math>+/A<math>\beta</math>-, n</b>                                                                    | 118/168                          |
| A $\beta$ 42/A $\beta$ 40 <sup>IPMS-WashU</sup>                                                                                      | 0.852 [0.807-0.896]              |
| A $\beta$ 42/A $\beta$ 40 <sup>IA-Elc</sup>                                                                                          | 0.773 [0.719-0.827] <sup>a</sup> |
| A $\beta$ 42/A $\beta$ 40 <sup>LCMS-Arc</sup>                                                                                        | 0.761 [0.704-0.818] <sup>a</sup> |
| A $\beta$ 42/A $\beta$ 40 <sup>IA-EI</sup>                                                                                           | 0.688 [0.626-0.750] <sup>b</sup> |
| A $\beta$ 42/A $\beta$ 40 <sup>IA-N4PE</sup>                                                                                         | 0.670 [0.608-0.732] <sup>b</sup> |
|                                                                                                                                      |                                  |
| <b>Sub-cohort with A<math>\beta</math>42/A<math>\beta</math>40<sup>IPMS-Shim</sup>, A<math>\beta</math>+/A<math>\beta</math>-, n</b> | 86/114                           |
| A $\beta$ 42/A $\beta$ 40 <sup>IPMS-WashU</sup>                                                                                      | 0.864 [0.814-0.914]              |
| A $\beta$ 42/A $\beta$ 40 <sup>IPMS-Shim</sup>                                                                                       | 0.834 [0.779-0.890]              |
| A $\beta$ 42/A $\beta$ 40 <sup>LCMS-Arc</sup>                                                                                        | 0.783 [0.720-0.847] <sup>c</sup> |
| A $\beta$ 42/A $\beta$ 40 <sup>IA-Elc</sup>                                                                                          | 0.773 [0.709-0.837] <sup>a</sup> |
| A $\beta$ 42/A $\beta$ 40 <sup>IA-EI</sup>                                                                                           | 0.720 [0.648-0.791] <sup>a</sup> |
| A $\beta$ 42/A $\beta$ 40 <sup>IA-N4PE</sup>                                                                                         | 0.668 [0.594-0.743] <sup>b</sup> |
|                                                                                                                                      |                                  |
| <b>Sub-cohort with A<math>\beta</math>42/A<math>\beta</math>40<sup>IA-Quan</sup>, A<math>\beta</math>+/A<math>\beta</math>-, n</b>   | 95/138                           |
| A $\beta$ 42/A $\beta$ 40 <sup>IPMS-WashU</sup>                                                                                      | 0.842 [0.791-0.894]              |
| A $\beta$ 42/A $\beta$ 40 <sup>IA-Elc</sup>                                                                                          | 0.797 [0.740-0.854]              |
| A $\beta$ 42/A $\beta$ 40 <sup>LCMS-Arc</sup>                                                                                        | 0.751 [0.684-0.817] <sup>a</sup> |
| A $\beta$ 42/A $\beta$ 40 <sup>IPMS-UGOT</sup>                                                                                       | 0.710 [0.640-0.780] <sup>a</sup> |
| A $\beta$ 42/A $\beta$ 40 <sup>IA-EI</sup>                                                                                           | 0.692 [0.622-0.763] <sup>b</sup> |
| A $\beta$ 42/A $\beta$ 40 <sup>IA-N4PE</sup>                                                                                         | 0.691 [0.622-0.759] <sup>b</sup> |
| A $\beta$ 42/A $\beta$ 40 <sup>IA-Quan</sup>                                                                                         | 0.633 [0.559-0.706] <sup>b</sup> |

Data are shown as AUC (95% CI); AUC of two ROC curves were compared with DeLong test. Out of 322 participants, 185 were classified as CSF A $\beta$ 42/A $\beta$ 40 negative and 137 were classified as CSF A $\beta$ 42/A $\beta$ 40 positive. CSF A $\beta$ 42/A $\beta$ 40 data was binarized using previously described cutoff (0.091).<sup>16</sup>

<sup>a</sup> p<0.01; <sup>b</sup> p<0.001; <sup>c</sup> p<0.05 compared with A $\beta$ 42/A $\beta$ 40<sup>IPMS-WashU</sup>

A $\beta$ , amyloid- $\beta$ ; AUC, area under the curve; CSF, cerebrospinal fluid; IA-EI, immunoassay from Euroimmun; IA-Elc, Elecsys immunoassay from Roche Diagnostics; IA-N4PE, N4PE Simoa immunoassay from Quanterix; IA-Quan, Simoa immunoassay from Quanterix; IPMS-Shim, immunoprecipitation coupled mass spectrometry method developed by Shimadzu; IPMS-WashU, immunoprecipitation-coupled mass spectrometry method developed at Washington University; IPMS-WashU, immunoprecipitation-coupled mass spectrometry method developed at the University of Gothenburg; LCMS-Arc, antibody-free liquid chromatography-mass spectrometry method developed by Araclon; ROC, receiver operating characteristic.

**eTable 7.** ROC analysis of plasma A $\beta$ 42 and A $\beta$ 40 combined with APOE  $\epsilon$ 4 genotype for abnormal CSF A $\beta$ 42 and A $\beta$ 40 in BioFINDER

| Plasma A $\beta$ 42/A $\beta$ 40 + APOE $\epsilon$ 4                                                                                                                                                   | CSF A $\beta$ 42/A $\beta$ 40    |
|--------------------------------------------------------------------------------------------------------------------------------------------------------------------------------------------------------|----------------------------------|
| <b>Whole cohort, A<math>\beta</math>+/A<math>\beta</math>-, n</b>                                                                                                                                      | 118/167                          |
| A $\beta$ 42/A $\beta$ 40 <sup>IPMS-WashU</sup>                                                                                                                                                        | 0.882 [0.842-0.922]              |
| A $\beta$ 42/A $\beta$ 40 <sup>LCMS-Arc</sup>                                                                                                                                                          | 0.841 [0.794-0.887] <sup>a</sup> |
| A $\beta$ 42/A $\beta$ 40 <sup>IA-Elc</sup>                                                                                                                                                            | 0.820 [0.771-0.869] <sup>a</sup> |
| A $\beta$ 42/A $\beta$ 40 <sup>IA-EI</sup>                                                                                                                                                             | 0.794 [0.741-0.846] <sup>b</sup> |
| A $\beta$ 42/A $\beta$ 40 <sup>IA-N4PE</sup>                                                                                                                                                           | 0.783 [0.729-0.836] <sup>b</sup> |
|                                                                                                                                                                                                        |                                  |
| <b>Sub-cohort with A<math>\beta</math>42/A<math>\beta</math>40<sup>IPMS-Shim</sup>, A<math>\beta</math>+/A<math>\beta</math>-, n</b>                                                                   | 86/113                           |
| A $\beta$ 42/A $\beta$ 40 <sup>IPMS-WashU</sup>                                                                                                                                                        | 0.902 [0.861-0.944]              |
| A $\beta$ 42/A $\beta$ 40 <sup>IPMS-Shim</sup>                                                                                                                                                         | 0.868 [0.819-0.918]              |
| A $\beta$ 42/A $\beta$ 40 <sup>LCMS-Arc</sup>                                                                                                                                                          | 0.863 [0.812-0.913]              |
| A $\beta$ 42/A $\beta$ 40 <sup>IA-Elc</sup>                                                                                                                                                            | 0.834 [0.778-0.889] <sup>b</sup> |
| A $\beta$ 42/A $\beta$ 40 <sup>IA-EI</sup>                                                                                                                                                             | 0.816 [0.757-0.875] <sup>b</sup> |
| A $\beta$ 42/A $\beta$ 40 <sup>IA-N4PE</sup>                                                                                                                                                           | 0.798 [0.736-0.861] <sup>b</sup> |
|                                                                                                                                                                                                        |                                  |
| <b>Sub-cohort with A<math>\beta</math>42/A<math>\beta</math>40<sup>IPMS-UGOT</sup> and A<math>\beta</math>42/A<math>\beta</math>40<sup>IA-Quan</sup>, A<math>\beta</math>+/A<math>\beta</math>-, n</b> | 91/136                           |
| A $\beta$ 42/A $\beta$ 40 <sup>IPMS-WashU</sup>                                                                                                                                                        | 0.870 [0.823-0.917]              |
| A $\beta$ 42/A $\beta$ 40 <sup>LCMS-Arc</sup>                                                                                                                                                          | 0.841 [0.788-0.894]              |
| A $\beta$ 42/A $\beta$ 40 <sup>IA-Elc</sup>                                                                                                                                                            | 0.841 [0.790-0.891]              |
| A $\beta$ 42/A $\beta$ 40 <sup>IPMS-UGOT</sup>                                                                                                                                                         | 0.805 [0.747-0.864] <sup>a</sup> |
| A $\beta$ 42/A $\beta$ 40 <sup>IA-EI</sup>                                                                                                                                                             | 0.805 [0.747-0.864] <sup>a</sup> |
| A $\beta$ 42/A $\beta$ 40 <sup>IA-N4PE</sup>                                                                                                                                                           | 0.794 [0.735-0.854] <sup>a</sup> |
| A $\beta$ 42/A $\beta$ 40 <sup>IA-Quan</sup>                                                                                                                                                           | 0.779 [0.717-0.841] <sup>b</sup> |

Data are shown as AUC (95% CI); AUC of two ROC curves were compared with DeLong test. CSF A $\beta$ 42/A $\beta$ 40 data was binarized using previously described cutoff (0.059).<sup>6</sup>

<sup>a</sup>p<0.05; <sup>b</sup>p<0.01 compared with A $\beta$ 42/A $\beta$ 40<sup>IPMS-WashU</sup>

A $\beta$ , amyloid- $\beta$ ; AUC, area under the curve; CSF, cerebrospinal fluid; IA-EI, immunoassay from Euroimmun; IA-Elc, Elecsys immunoassay from Roche Diagnostics; IA-N4PE, N4PE Simoa immunoassay from Quanterix; IA-Quan, Simoa immunoassay from Quanterix; IPMS-Shim, immunoprecipitation coupled mass spectrometry method developed by Shimadzu; IPMS-WashU, immunoprecipitation-coupled mass spectrometry method developed at Washington University; LCMS-Arc, antibody-free liquid chromatography-mass spectrometry method developed by Araclon; ROC, receiver operating characteristic; PET positron emission tomography.

**eTable 8.** Plasma concentrations of A $\beta$ 42 and A $\beta$ 40 in ADNI

|                                    | <b>A<math>\beta</math>-negative<br/>n=63</b> | <b>A<math>\beta</math>-positive<br/>n=59</b> | <b>P-value</b> |
|------------------------------------|----------------------------------------------|----------------------------------------------|----------------|
| A $\beta$ 42 <sup>IPMS-WashU</sup> | 37.0 (34.8-42.3)                             | 34.5 (31.3-40.0)                             | 0.005          |
| A $\beta$ 40 <sup>IPMS-WashU</sup> | 281.2 (263.0-312.2)                          | 279.4 (260.2-325.4)                          | 0.73           |
| A $\beta$ 42 <sup>IPMS-Shim</sup>  | 0.324 (0.290-0.363)                          | 0.293 (0.266-0.343)                          | 0.004          |
| A $\beta$ 40 <sup>IPMS-Shim</sup>  | 8.0 (7.0-8.9)                                | 8.0 (6.7-9.6)                                | 0.75           |
| A $\beta$ 42 <sup>IPMS-UGOT</sup>  | 19.7 (17.3-25.1)                             | 17.2 (13.2-21.7)                             | 0.013          |
| A $\beta$ 40 <sup>IPMS-UGOT</sup>  | 277.0 (252.0-313.0)                          | 273.0 (236.0-322.0)                          | 0.49           |
| A $\beta$ 42 <sup>IA-Elc</sup>     | 52.7 (48.0-60.8)                             | 47.0 (42.0-54.6)                             | 0.003          |
| A $\beta$ 40 <sup>IA-Elc</sup>     | 316.0 (287.0-339.0)                          | 313.0 (278.0-355.0)                          | 0.87           |
| A $\beta$ 42 <sup>IA-N4PE</sup>    | 7.8 (6.8-8.9)                                | 7.1 (6.2-8.4)                                | 0.036          |
| A $\beta$ 40 <sup>IA-N4PE</sup>    | 164.1 (134.2-194.6)                          | 160.7 (133.9-208.8)                          | 0.65           |
| A $\beta$ 42 <sup>IA-Quan</sup>    | 13.8 (12.0-15.4)                             | 13.0 (11.7-14.8)                             | 0.24           |
| A $\beta$ 40 <sup>IA-Quan</sup>    | 341.0 (305.0-374.0)                          | 353.0 (303.0-400.0)                          | 0.43           |

A $\beta$  status was defined using previously described A $\beta$ -PET cutoff (1.11).<sup>17,18</sup> Biomarker concentrations are shown in pg/ml except A $\beta$ 42<sup>IPMS-Shim</sup> and A $\beta$ 40<sup>IPMS-Shim</sup> where the values are signal intensity normalized to the internal standard SIL-A $\beta$ (1-38).

A $\beta$ , amyloid- $\beta$ ; IA-Elc, Elecsys immunoassay from Roche Diagnostics; IA-N4PE, N4PE Simoa immunoassay from Quanterix; IA-Quan, Simoa immunoassay from Quanterix; IPMS-UGOT, immunoprecipitation-coupled mass spectrometry method developed at the University of Gothenburg; IPMS-Shim, immunoprecipitation coupled mass spectrometry method developed by Shimadzu; IPMS-WashU, immunoprecipitation-coupled mass spectrometry method developed at Washington University.

## eReferences

1. Petersen RC. Mild cognitive impairment as a diagnostic entity. *J Intern Med.* 2004;256(3):183-194.
2. Mattsson N, Insel PS, Palmqvist S, et al. Increased amyloidogenic APP processing in APOE varepsilon4-negative individuals with cerebral beta-amyloidosis. *Nat Commun.* 2016;7:10918.
3. Jack CR, Jr., Bennett DA, Blennow K, et al. NIA-AA Research Framework: Toward a biological definition of Alzheimer's disease. *Alzheimers Dement.* 2018;14(4):535-562.
4. Ovod V, Ramsey KN, Mawuenyega KG, et al. Amyloid beta concentrations and stable isotope labeling kinetics of human plasma specific to central nervous system amyloidosis. *Alzheimers Dement.* 2017;13(8):841-849.
5. Palmqvist S, Janelidze S, Quiroz YT, et al. Discriminative Accuracy of Plasma Phospho-tau217 for Alzheimer Disease vs Other Neurodegenerative Disorders. *JAMA.* 2020.
6. Palmqvist S, Janelidze S, Stomrud E, et al. Performance of Fully Automated Plasma Assays as Screening Tests for Alzheimer Disease-Related beta-Amyloid Status. *JAMA Neurol.* 2019.
7. Verberk IMW, Slot RE, Verfaillie SCJ, et al. Plasma Amyloid as Prescreener for the Earliest Alzheimer Pathological Changes. *Ann Neurol.* 2018;84(5):648-658.
8. Janelidze S, Stomrud E, Palmqvist S, et al. Plasma beta-amyloid in Alzheimer's disease and vascular disease. *Sci Rep.* 2016;6:26801.
9. Nakamura A, Kaneko N, Villemagne VL, et al. High performance plasma amyloid-beta biomarkers for Alzheimer's disease. *Nature.* 2018;554(7691):249-254.
10. Schindler SE, Bollinger JG, Ovod V, et al. High-precision plasma beta-amyloid 42/40 predicts current and future brain amyloidosis. *Neurology.* 2019;93(17):e1647-e1659.
11. Janelidze S, Palmqvist S, Leuzy A, et al. Detecting amyloid positivity in early Alzheimer's disease using combinations of plasma Aβ42/Aβ40 and P-tau. *Alzheimer's & Dementia.* 2021;In press.
12. Keshavan A, Pannee J, Karikari TK, et al. Population-based blood screening for preclinical Alzheimer's disease in a British birth cohort at age 70. *Brain.* 2021;144(2):434-449.
13. Thijssen EH, Verberk IMW, Vanbrabant J, et al. Highly specific and ultrasensitive plasma test detects Aβeta(1-42) and Aβeta(1-40) in Alzheimer's disease. *Sci Rep.* 2021;11(1):9736.
14. Koole M, Lewis DM, Buckley C, et al. Whole-body biodistribution and radiation dosimetry of 18F-GE067: a radioligand for in vivo brain amyloid imaging. *J Nucl Med.* 2009;50(5):818-822.
15. Lundqvist R, Lilja J, Thomas BA, et al. Implementation and validation of an adaptive template registration method for 18F-flutemetamol imaging data. *J Nucl Med.* 2013;54(8):1472-1478.
16. Minta K, Brinkmalm G, Janelidze S, et al. Quantification of total apolipoprotein E and its isoforms in cerebrospinal fluid from patients with neurodegenerative diseases. *Alzheimers Res Ther.* 2020;12(1):19.
17. Landau SM, Lu M, Joshi AD, et al. Comparing positron emission tomography imaging and cerebrospinal fluid measurements of beta-amyloid. *Ann Neurol.* 2013;74(6):826-836.
18. Landau SM, Mintun MA, Joshi AD, et al. Amyloid deposition, hypometabolism, and longitudinal cognitive decline. *Ann Neurol.* 2012;72(4):578-586.

## **eAppendix.** ADNI Investigators

Michael Weiner  
Paul Aisen  
Ronald Petersen  
Clifford R. Jack Jr.  
William Jagust  
John Q. Trojanowski  
Arthur W. Toga  
Laurel Beckett  
Robert C. Green  
Andrew J. Saykin  
John Morris  
Leslie M. Shaw  
Enchi Liu  
Tom Montine  
Ronald G. Thomas  
Michael Donahue  
Sarah Walter  
Devon Gessert  
Tamie Sather  
Gus Jiminez  
Danielle Harvey  
Natthew Bernstein  
Nick Fox  
Paul Thompson  
Norbert Schuff  
Charles DeCarli  
Bret Borowski  
Jeff Gunter  
Matt Senjem  
Prashanti Vemuri  
David Jones  
Kejal Kantarci  
Chard Ward  
Robert A. Koeppe  
Norm Foster  
Eric M. Reiman  
Kewei Chen  
Chet Mathis  
Susan Landau  
Nigel J. Cairns  
Erin Householder  
Lisa T. Reinwald  
Virginia Lee  
Magdalena Korecka  
Michal Figurski  
Karen Crawford  
Scott Neu  
Tatiana M. Foroud  
Steven Potkin  
Li Chen  
Faber Kelley  
Sungeun Kim  
Kwangsik Nho  
Zaven Kachaturian  
Richard Frank

Peter J. Snyder  
Susan Molchan  
Jeffrey Kaye  
Joseph Quinn  
Betty Lind  
Raina Carter  
Sara Dolen  
Lon S. Schneider  
Sonia Pawluczyk  
Mauricio Beccera  
Liberty Teodoro  
Bryan M. Spann  
James Brewer  
Helen Vanderswag  
Adam Fleisher  
Judith L. Heidebrink  
Joanne L. Ford  
Sara S. Mason  
Colleen S. Albers  
David Knopman  
Kris Johnson  
Rachelle S. Doody  
Javier Villanueva  
Munir Chowdhury  
Susan Rountree  
Mimi Dang  
Yaakov Stern  
Lawrence S. Honig  
Karen L. Bell  
Beau Ances  
Maria Carroll  
Sue Leon  
Erin Householder  
Mark A. Mintun  
Stacy Schneider  
Angela Oliver  
Randal Griffith  
David Clark  
David Geldmacher  
John Brockington  
Erik Roberson  
Hillel Grossman  
Effie Mitsis  
Leyla deToledo-Morrell  
Raj C. Shah  
Ranjan Duara  
Daniel Varon  
Maria T. Greig  
Peggy Roberts  
Marilyn Albert  
Chiadi Onyike  
Daniel D'Agostino  
Stephanie Kleib  
James E. Galvin  
Dana M. Pogorelec  
Brittany Cerbone  
Christina A. Michel



Henry Rusinek  
Mony J. De Leon  
Lidia Glodzik  
Susan De Santi  
Murali Doraiswamy  
Jeffrey R. Petrella  
Terence Z. Wong  
Jason H. Karlawish  
David Wolk  
Charles D. Smith  
Greg Jicha  
Peter Hardy  
Partha Sinha  
Elizabeth Oates  
Gary Conrad  
Oscar L. Lopez  
MaryAnn Oakley  
Donna M. Simpson  
Anton P. Porsteinsson  
Bonnie S. Goldstein  
Kim Martin  
Kelly M. Makino  
M. Saleem Ismael  
Connie Brand  
Ruth A. Mulnard  
Gaby Thai  
Catherina McAdams Ortiz  
Kyle Womack  
Dana M. Mathews  
Mary Quiceno  
Ramon Diaz Arrastia  
Richard King  
Myron Steiner  
Kristen Martin Cook  
Michael Devous  
Allan I. Levey  
James J. Lah  
Janet S. Cellar  
Jeffrey M. Burns  
Heather S. Anderson  
Russell h. Swerdlov  
Liana Apostolova  
Kathleen Tingus  
Ellen Woo  
Daniel H. Silverman  
Po H. Lu  
George Bartzokis  
Neill R. Graff-Radford  
Francine Parfitt  
Tracey Kendall  
Heather S. Johnson  
Martin R. Farlow  
Ann-Marie Hake  
Brandy R. Matthews  
Scott Herring  
Cynthia Hunt  
Christopher H. van Dyck

Richard E. Carson  
Martyha G. MacAvoy  
Howard Chertkow  
Howard Bergman  
Chris Hosein  
Sandra Black  
Bojana Stefanovic  
Curtis Caldwell  
Ging Yuek Robin  
Howard Feldman  
Benita Mudge  
Michele Assaly Past  
Andrew Kertesz  
John Rogers  
Dick Trost  
Charles Bernick  
Donna Munic  
Diana Kerwin  
Marek M. Mesulam  
Kristine Lipowski  
Chuang Kuo Wu  
Nancy Johnson  
Carl Sadowsky  
Walter Martinez  
Raymond S. Turner  
Kathleen Johnson  
Brigid Reynolds  
Reisa A. Sperling  
Keith A. Johnson  
Gad Marshall  
Meghan Frey  
Jerome Yesavage  
Joy L. Taylor  
Barton Lane  
Allyson Rosen  
Jared Tinklenberg  
Marwan N. Sabbagh  
Christine M. Belden  
Sherye A. Sirrel  
Neil Kowal  
Ronald Killiany  
Andrew E. Budson  
Alexander Norbash  
Patricia L. Johnson  
Thomas O. Obisesan  
Saba Wolday  
Joana Allard  
Alan Lerner  
Paula Ogrocki  
Leon Hudson  
Evan Fletcher  
Owen Carmichel  
John Olichney  
Smita Kittur  
Michael Borrie  
T.Y. Lee  
Rob Bartha

Sterling Johnson  
Sanjay Asthana  
Cynthia M. Carlsson  
Steven G. Potkin  
Adrian Preda  
Daan Nguyen  
Pierre Tarlot  
Stephanie Reeder  
Vernice Bates  
Horacio Capote  
Michelle Rainka  
Douglas W. Scharre  
Maria Kataki  
Anahita Adeli  
Earl A. Zimmerman  
Dzintra Celmins  
Alice D. Brown  
Godfrey D. Pearlson  
Karen Blank  
Karen Anderson  
Robert B. Santulli  
Tamar J. Kitzmiller  
Eben S. Schwartz  
Kaycee M. Sinks  
Jeff D. Williamson  
Pradeep Garg  
Franklin Watkins  
Brian R. Ott  
Henry Querfurth  
Geoffry Tremont  
Stephen Salloway  
Paul Malloy  
Stephen Correia  
Howard J. Rosen  
Bruce L. Miller  
Jacob Mintzer  
Kenneth Spicer  
David Bachman  
Elizabeth Pasternak  
Irina Rachiksky  
John Rogers  
Andrew Kertesz  
Nunzio Pomara  
Raymundo Hernando  
Antero Sarrael  
Susan K. Schultz  
Laura L. Boles  
Hyungsub Shim  
Karen E. Smith  
Norman Relkin  
Gloria Chaing  
Amanda Smith  
Kristin. Fargher  
Balebail A. Raj
